# Supplementary material
Source: PubMed Central journal article supplement (PMC7675220)

## Supplementary Online Content

Segar MW, Patel RB, Patel KV, et al. Association of visit-to-visit variability in kidney function and serum electrolyte indexes with risk of adverse clinical outcomes among patients with heart failure with preserved ejection fraction. *JAMA Cardiol*. Published online November 18, 2020. doi:10.1001/jamacardio.2020.5592

**eMethods.** Study Population and Laboratory Assessment

**eTable 1.** Baseline Characteristics Among Participants Included and Excluded From the Primary Analysis Across Laboratory Values

**eTable 2.** Significant Predictors of BUN and Creatinine Variability Assessed by ASV

**eTable 3.** Associations of Coefficient of Variation (CV) Among 5 Laboratory Measures and Outcomes

**eTable 4.** Associations of Standard Deviation (SD) Among 5 Laboratory Measures and Outcomes

**eTable 5.** Baseline Characteristics Across Quintiles of Creatinine Variability Assessed by ASV

**eTable 6.** Sensitivity Analysis: Associations of ASV and Primary Composite Outcome After Further Adjustment for NP Levels

**eTable 7.** Sensitivity Analyses: Associations of Variability and Primary Composite Outcome in the Americas Cohort

**eTable 8.** Sensitivity Analyses: Associations of ASV and Primary Composite Outcome Across Treatment Arms

**eTable 9.** Sensitivity Analyses: Associations of ASV and Primary Composite Outcome Across Tertiles of MAGGIC Risk Score

**eTable 10.** Comparison of Model Discrimination With Variability or Percent Change in Laboratory Value and MAGGIC Risk Score

**eTable 11.** Baseline Characteristics Across Quintiles of Sodium Variability Assessed by ASV

**eTable 12.** Baseline Characteristics Across Quintiles of Potassium Variability Assessed by ASV

**eTable 13.** Baseline Characteristics Across Quintiles of Chloride Variability Assessed by ASV

**eFigure 1.** The Mean Laboratory Value at Each Visit

**eFigure 2.** Sensitivity Analyses: Associations of ASV and Varying Variability Time Ranges and Risk of the Primary Composite Outcome.

**eFigure 3.** Sensitivity Analyses: Variability and Risk of Primary Composite Across Tertiles of the MAGGIC Risk Score

This supplementary material has been provided by the authors to give readers additional information about their work.

## **eMethods. Study Population and Laboratory Assessment**

### **Study Population**

In brief, the TOPCAT trial was a double-blind, parallel group, placebo-controlled randomized clinical trial that examined the cardiovascular effects of spironolactone among patients with chronic HFpEF and was conducted between August 2006 and January 2012 in 233 centers across the United States, Canada, Brazil, Argentina, Russia and Georgia <sup>1</sup>. The study included a total of 3,445 patients (aged between 50 and 90 years) with at least one symptom of HF, left ventricular (LV) ejection fraction of  $\geq 45\%$ , and either a history of hospitalization within the previous 12 months or an elevated natriuretic peptide level (brain natriuretic peptide [BNP]  $\geq 100$  pg/mL or N-terminal pro-BNP [NT-proBNP]  $\geq 360$  pg/mL) within 60 days prior to randomization. Entry serum potassium levels had to be  $< 5.0$  mEq/L. Key exclusion criteria included estimated glomerular filtration rate (eGFR)  $< 30$  mL/min/1.73m<sup>2</sup> or serum creatinine  $> 2.5$  mg/dL. Participants were randomly assigned to receive either spironolactone 15 mg daily or placebo in a 1:1 ratio. The drug could be uptitrated to a maximum of 45 mg daily over 4 months.

### **Laboratory Assessment**

Hemoglobin, BNP, and NT-proBNP levels were measured from blood samples obtained from trial participants at baseline or within 60 days prior to enrollment.

### **References**

1. Pitt B, Pfeffer MA, Assmann SF, et al. Spironolactone for heart failure with preserved ejection fraction. *N Engl J Med*. 2014;370(15):1383-1392.

**Supplemental Table 1.** Baseline characteristics among participants included and excluded from the primary analysis across laboratory values.

|                       | Sodium       |              | Potassium    |              | Chloride     |              | BUN          |              | Creatinine   |              |
|-----------------------|--------------|--------------|--------------|--------------|--------------|--------------|--------------|--------------|--------------|--------------|
|                       | Excluded     | Included     |
| N                     | 252          | 3193         | 250          | 3195         | 352          | 3093         | 966          | 2479         | 254          | 3191         |
| Age                   | 70.6 (9.9)   | 68.4 (9.5)   | 70.6 (9.9)   | 68.4 (9.5)   | 69.3 (9.7)   | 68.5 (9.6)   | 68.2 (9.4)   | 68.7 (9.7)   | 70.6 (9.9)   | 68.4 (9.5)   |
| Female                | 145 (57.5)   | 1627 (51.0)  | 143 (57.2)   | 1629 (51.0)  | 191 (54.3)   | 1581 (51.1)  | 539 (55.8)   | 1233 (49.7)  | 144 (56.7)   | 1628 (51.0)  |
| Race                  |              |              |              |              |              |              |              |              |              |              |
| White                 | 185 (73.4)   | 2877 (90.1)  | 184 (73.6)   | 2878 (90.1)  | 284 (80.7)   | 2778 (89.8)  | 856 (88.6)   | 2206 (89.0)  | 187 (73.6)   | 2875 (90.1)  |
| Black                 | 56 (22.2)    | 246 (7.7)    | 55 (22.0)    | 247 (7.7)    | 57 (16.2)    | 245 (7.9)    | 85 (8.8)     | 217 (8.8)    | 56 (22.0)    | 246 (7.7)    |
| Other                 | 11 (4.4)     | 70 (2.2)     | 11 (4.4)     | 70 (2.2)     | 11 (3.1)     | 70 (2.3)     | 25 (2.6)     | 56 (2.3)     | 11 (4.3)     | 70 (2.2)     |
| Placebo treatment arm | 138 (54.8)   | 1585 (49.6)  | 136 (54.4)   | 1587 (49.7)  | 187 (53.1)   | 1536 (49.7)  | 492 (50.9)   | 1231 (49.7)  | 136 (53.5)   | 1587 (49.7)  |
| SBP                   | 128.3 (18.0) | 129.3 (13.6) | 128.5 (17.9) | 129.3 (13.6) | 128.6 (16.3) | 129.3 (13.7) | 129.9 (14.2) | 128.9 (13.9) | 128.5 (17.8) | 129.3 (13.6) |
| BMI                   | 33.7 (9.2)   | 31.9 (6.9)   | 33.8 (9.2)   | 31.9 (6.9)   | 32.9 (8.4)   | 32.0 (6.9)   | 31.9 (7.0)   | 32.1 (7.1)   | 33.8 (9.2)   | 31.9 (6.9)   |
| NYHA class III/IV     | 126 (51.0)   | 1010 (31.6)  | 125 (51.0)   | 1011 (31.7)  | 175 (50.4)   | 961 (31.1)   | 341 (35.5)   | 795 (32.1)   | 125 (50.2)   | 1011 (31.7)  |
| Alcohol use           |              |              |              |              |              |              |              |              |              |              |
| 0                     | 209 (83.6)   | 2472 (77.4)  | 207 (83.5)   | 2474 (77.5)  | 296 (84.6)   | 2385 (77.1)  | 812 (84.2)   | 1869 (75.4)  | 209 (82.9)   | 2472 (77.5)  |
| 1-5                   | 29 (11.6)    | 551 (17.3)   | 29 (11.7)    | 551 (17.3)   | 41 (11.7)    | 539 (17.4)   | 118 (12.2)   | 462 (18.6)   | 30 (11.9)    | 550 (17.2)   |
| 5-10                  | 9 (3.6)      | 117 (3.7)    | 9 (3.6)      | 117 (3.7)    | 10 (2.9)     | 116 (3.8)    | 28 (2.9)     | 98 (4.0)     | 9 (3.6)      | 117 (3.7)    |
| 10+                   | 1 (0.4)      | 51 (1.6)     | 1 (0.4)      | 51 (1.6)     | 1 (0.3)      | 51 (1.6)     | 4 (0.4)      | 48 (1.9)     | 2 (0.8)      | 50 (1.6)     |
| Smoking               | 27 (10.8)    | 333 (10.4)   | 27 (10.9)    | 333 (10.4)   | 44 (12.6)    | 316 (10.2)   | 116 (12.0)   | 244 (9.8)    | 28 (11.1)    | 332 (10.4)   |
| Atrial fibrillation   | 90 (36.0)    | 1124 (35.2)  | 90 (36.3)    | 1124 (35.2)  | 123 (35.1)   | 1091 (35.3)  | 280 (29.0)   | 934 (37.7)   | 88 (34.9)    | 1126 (35.3)  |
| Diabetes              |              |              |              |              |              |              |              |              |              |              |
| None                  | 136 (54.4)   | 2188 (68.5)  | 135 (54.4)   | 2189 (68.5)  | 211 (60.3)   | 2113 (68.3)  | 673 (69.8)   | 1651 (66.6)  | 133 (52.8)   | 2191 (68.7)  |
| Insulin dependent     | 53 (21.2)    | 374 (11.7)   | 52 (21.0)    | 375 (11.7)   | 59 (16.9)    | 368 (11.9)   | 96 (10.0)    | 331 (13.4)   | 54 (21.4)    | 373 (11.7)   |
| Non-insulin dependent | 61 (24.4)    | 630 (19.7)   | 61 (24.6)    | 630 (19.7)   | 80 (22.9)    | 611 (19.8)   | 195 (20.2)   | 496 (20.0)   | 65 (25.8)    | 626 (19.6)   |
| ACEi/ARB use          | 204 (81.6)   | 2696 (84.5)  | 203 (81.9)   | 2697 (84.4)  | 293 (83.7)   | 2607 (84.3)  | 805 (83.6)   | 2095 (84.5)  | 208 (82.5)   | 2692 (84.4)  |
| Diuretic use          | 211 (84.4)   | 2606 (81.6)  | 210 (84.7)   | 2607 (81.6)  | 270 (77.1)   | 2547 (82.4)  | 698 (72.5)   | 2119 (85.5)  | 213 (84.5)   | 2604 (81.6)  |
| Insulin use           | 53 (21.2)    | 374 (11.7)   | 52 (21.0)    | 375 (11.7)   | 59 (16.9)    | 368 (11.9)   | 96 (10.0)    | 331 (13.4)   | 54 (21.4)    | 373 (11.7)   |
| Sodium, mmol/L        | 140.1 (9.8)  | 141.1 (6.1)  | 140.1 (9.9)  | 141.1 (6.1)  | 140.6 (8.6)  | 141.1 (6.2)  | 141.2 (10.4) | 141.0 (4.0)  | 140.1 (9.8)  | 141.1 (6.1)  |
| Potassium, mmol/L     | 4.2 (0.6)    | 4.3 (0.5)    | 4.2 (0.6)    | 4.3 (0.5)    | 4.2 (0.6)    | 4.2 (0.5)    | 4.3 (0.5)    | 4.2 (0.4)    | 4.2 (0.7)    | 4.3 (0.5)    |
| Chloride, mmol/L      | 99.1 (20.1)  | 98.6 (21.3)  | 99.1 (20.2)  | 98.6 (21.3)  | 71.7 (50.2)  | 101.7 (11.1) | 94.7 (29.4)  | 100.2 (16.7) | 99.1 (20.0)  | 98.6 (21.3)  |
| BUN, mg/dL            | 19.1 (19.5)  | 15.7 (13.5)  | 19.2 (19.5)  | 15.7 (13.5)  | 16.4 (18.7)  | 15.9 (13.4)  | 3.9 (14.5)   | 20.6 (10.7)  | 19.2 (19.7)  | 15.7 (13.5)  |

|                   |              |              |              |              |              |              |              |              |              |              |
|-------------------|--------------|--------------|--------------|--------------|--------------|--------------|--------------|--------------|--------------|--------------|
| Creatinine, mg/dL | 1.2 (0.4)    | 1.1 (0.3)    | 1.2 (0.4)    | 1.1 (0.3)    | 1.2 (0.3)    | 1.1 (0.3)    | 1.1 (0.3)    | 1.1 (0.3)    | 1.2 (0.4)    | 1.1 (0.3)    |
| Glucose, mg/dL    | 126.1 (61.7) | 114.0 (48.8) | 125.4 (60.2) | 114.1 (49.0) | 121.2 (59.5) | 114.1 (48.7) | 114.4 (47.6) | 115.1 (50.8) | 125.7 (60.9) | 114.0 (48.9) |
| Hemoglobin, mg/dL | 12.0 (3.6)   | 13.3 (2.1)   | 12.0 (3.6)   | 13.3 (2.1)   | 12.6 (3.3)   | 13.2 (2.1)   | 13.4 (2.6)   | 13.1 (2.2)   | 12.0 (3.6)   | 13.3 (2.1)   |

*Abbreviations:*

ACEi/ARB, angiotensin converting enzyme inhibitor / angiotensin receptor blocker; SBP, systolic blood pressure; BMI, body mass index; NYHA, New York Heart Association; CVD, cardiovascular disease; BUN, blood urea nitrogen; BNP, brain natriuretic peptide; NT-proBNP, N-terminal prohormone brain natriuretic peptide

**Supplemental Table 2.** Significant predictors of blood urea nitrogen (BUN) and creatinine variability assessed by ASV.

| Covariate                                                                   | Coefficient (95% CI)     | P-value |
|-----------------------------------------------------------------------------|--------------------------|---------|
| <i>BUN</i>                                                                  |                          |         |
| Americas cohort<br>(ref: non-Americas cohort)                               | 1.20 (0.68, 1.72)        | <0.001  |
| Spironolactone treatment arm                                                | 0.99 (0.59, 1.39)        | <0.001  |
| In-hospital enrollment stratum<br>(ref: natriuretic peptide enrollment arm) | 0.78 (0.30, 1.25)        | 0.001   |
| Baseline laboratory value                                                   | 0.20 (0.18, 0.22)        | <0.001  |
| Loop-diuretic dose at baseline                                              | 0.01 (0.008, 0.16)       | <0.001  |
| Change in loop-diuretic dose at month 4                                     | 0.006 (0.0009, 0.01)     | 0.006   |
| Black race                                                                  | 0.90 (0.16, 1.66)        | 0.02    |
| <i>Creatinine</i>                                                           |                          |         |
| Americas cohort<br>(ref: non-Americas cohort)                               | 0.028 (0.02, 0.04)       | <0.001  |
| Spironolactone treatment arm                                                | 0.021 (0.01, 0.03)       | <0.001  |
| In-hospital enrollment stratum<br>(ref: natriuretic peptide enrollment arm) | 0.018 (0.008, 0.03)      | <0.001  |
| Female sex<br>(ref: male sex)                                               | 0.022 (0.01, 0.03)       | <0.001  |
| Baseline laboratory value                                                   | 0.13 (0.12, 0.15)        | <0.001  |
| ACEi/ARB medication use                                                     | 0.016 (0.005, 0.03)      | 0.006   |
| Loop-diuretic dose at baseline                                              | 0.00024 (0.0002, 0.0003) | <0.001  |

**Supplemental Table 3.** Associations of coefficient of variation (CV) among 5 laboratory measures with the primary composite end point (top) and all-cause mortality (bottom).

|                                                                                                                                                                                                                                                                                                                                                                                                                                                                                                                                                                                                                                                                                                                                                                                             | Model 1                           |         | Model 2                           |         | Model 3                           |         |
|---------------------------------------------------------------------------------------------------------------------------------------------------------------------------------------------------------------------------------------------------------------------------------------------------------------------------------------------------------------------------------------------------------------------------------------------------------------------------------------------------------------------------------------------------------------------------------------------------------------------------------------------------------------------------------------------------------------------------------------------------------------------------------------------|-----------------------------------|---------|-----------------------------------|---------|-----------------------------------|---------|
|                                                                                                                                                                                                                                                                                                                                                                                                                                                                                                                                                                                                                                                                                                                                                                                             | HR per 1-SD higher CV<br>(95% CI) | P-value | HR per 1-SD higher CV<br>(95% CI) | P-value | HR per 1-SD higher CV<br>(95% CI) | P-value |
| <i>Outcome: Primary composite outcome</i>                                                                                                                                                                                                                                                                                                                                                                                                                                                                                                                                                                                                                                                                                                                                                   |                                   |         |                                   |         |                                   |         |
| <b>BUN</b>                                                                                                                                                                                                                                                                                                                                                                                                                                                                                                                                                                                                                                                                                                                                                                                  | 1.22<br>(1.13-1.31)               | <0.001  | 1.21<br>(1.11-1.30)               | <0.001  | 1.24<br>(1.11-1.39)               | <0.001  |
| <b>Creatinine</b>                                                                                                                                                                                                                                                                                                                                                                                                                                                                                                                                                                                                                                                                                                                                                                           | 1.22<br>(1.13-1.32)               | <0.001  | 1.17<br>(1.08-1.26)               | <0.001  | 1.16<br>(1.04-1.29)               | 0.009   |
| <b>Sodium</b>                                                                                                                                                                                                                                                                                                                                                                                                                                                                                                                                                                                                                                                                                                                                                                               | 1.15<br>(1.05-1.25)               | 0.003   | 1.15<br>(1.04-1.23)               | 0.005   | 1.21<br>(1.02-1.37)               | 0.02    |
| <b>Potassium</b>                                                                                                                                                                                                                                                                                                                                                                                                                                                                                                                                                                                                                                                                                                                                                                            | 1.19<br>(1.10-1.29)               | <0.001  | 1.18<br>(1.08-1.28)               | <0.001  | 1.24<br>(1.03-1.57)               | 0.01    |
| <b>Chloride</b>                                                                                                                                                                                                                                                                                                                                                                                                                                                                                                                                                                                                                                                                                                                                                                             | 1.12<br>(1.03-1.23)               | 0.01    | 1.14<br>(1.03-1.25)               | 0.008   | 1.25<br>(1.09-1.44)               | 0.001   |
| <i>Outcome: All-cause mortality</i>                                                                                                                                                                                                                                                                                                                                                                                                                                                                                                                                                                                                                                                                                                                                                         |                                   |         |                                   |         |                                   |         |
| <b>BUN</b>                                                                                                                                                                                                                                                                                                                                                                                                                                                                                                                                                                                                                                                                                                                                                                                  | 1.18<br>(1.08-1.28)               | <0.001  | 1.12<br>(1.03-1.23)               | 0.01    | 1.12<br>(1.01-1.22)               | 0.04    |
| <b>Creatinine</b>                                                                                                                                                                                                                                                                                                                                                                                                                                                                                                                                                                                                                                                                                                                                                                           | 1.18<br>(1.10-1.27)               | <0.001  | 1.14<br>(1.05-1.23)               | 0.002   | 1.13<br>(1.02-1.27)               | 0.03    |
| <b>Sodium</b>                                                                                                                                                                                                                                                                                                                                                                                                                                                                                                                                                                                                                                                                                                                                                                               | 1.14<br>(1.03-1.25)               | 0.01    | 1.12<br>(1.02-1.24)               | 0.02    | 1.15<br>(0.98-1.35))              | 0.08    |
| <b>Potassium</b>                                                                                                                                                                                                                                                                                                                                                                                                                                                                                                                                                                                                                                                                                                                                                                            | 1.11<br>(1.02-1.21)               | 0.02    | 1.09<br>(1.00-1.19)               | 0.049   | 1.10<br>(0.97-1.22)               | 0.13    |
| <b>Chloride</b>                                                                                                                                                                                                                                                                                                                                                                                                                                                                                                                                                                                                                                                                                                                                                                             | 1.15<br>(1.05-1.25)               | 0.003   | 1.16<br>(1.05-1.28)               | 0.003   | 1.29<br>(1.12-1.49)               | <0.001  |
| <p>BUN, blood urea nitrogen.</p> <p>Model 1 – adjusted for age, sex, race, education level, treatment arm, country of enrollment, and enrollment stratum (either elevated NP levels of HF hospitalization).</p> <p>Model 2 – covariates in Model 1 + BMI, SBP, diabetes status (none, insulin dependent, non-insulin dependent), alcohol use, smoking history, history of atrial fibrillation, ACEi/ARB use (yes/no), history of CVD, New York Heart Association (NYHA) class, and baseline respective laboratory value (either BUN, creatinine, potassium, sodium, or chloride).</p> <p>Model 3 – covariates of Model 2 + percent change in respective laboratory value, variability in SBP and BMI, and spironolactone and loop diuretic medication dose as a time varying covariate.</p> |                                   |         |                                   |         |                                   |         |

**Supplemental Table 4.** Associations of standard deviation (SD) among 5 laboratory measures with the primary composite end point (top) and all-cause mortality (bottom).

|                                                                                                                                                                                                                                                                                                                                                                                                                                                                                                                                                                                                                                                                                                                                                                                             | Model 1                        |         | Model 2                        |         | Model 3                        |         |
|---------------------------------------------------------------------------------------------------------------------------------------------------------------------------------------------------------------------------------------------------------------------------------------------------------------------------------------------------------------------------------------------------------------------------------------------------------------------------------------------------------------------------------------------------------------------------------------------------------------------------------------------------------------------------------------------------------------------------------------------------------------------------------------------|--------------------------------|---------|--------------------------------|---------|--------------------------------|---------|
|                                                                                                                                                                                                                                                                                                                                                                                                                                                                                                                                                                                                                                                                                                                                                                                             | HR per 1-SD higher SD (95% CI) | P-value | HR per 1-SD higher SD (95% CI) | P-value | HR per 1-SD higher SD (95% CI) | P-value |
| <i>Outcome: Primary composite outcome</i>                                                                                                                                                                                                                                                                                                                                                                                                                                                                                                                                                                                                                                                                                                                                                   |                                |         |                                |         |                                |         |
| <b>BUN</b>                                                                                                                                                                                                                                                                                                                                                                                                                                                                                                                                                                                                                                                                                                                                                                                  | 1.25<br>(1.18-1.34)            | <0.001  | 1.18<br>(1.09-1.28)            | <0.001  | 1.23<br>(1.09-1.38)            | <0.001  |
| <b>Creatinine</b>                                                                                                                                                                                                                                                                                                                                                                                                                                                                                                                                                                                                                                                                                                                                                                           | 1.27<br>(1.20-1.35)            | <0.001  | 1.18<br>(1.10-1.28)            | <0.001  | 1.15<br>(1.03-1.29)            | 0.009   |
| <b>Sodium</b>                                                                                                                                                                                                                                                                                                                                                                                                                                                                                                                                                                                                                                                                                                                                                                               | 1.14<br>(1.05-1.25)            | 0.003   | 1.14<br>(1.04-1.25)            | 0.006   | 1.21<br>(1.02-1.37)            | 0.02    |
| <b>Potassium</b>                                                                                                                                                                                                                                                                                                                                                                                                                                                                                                                                                                                                                                                                                                                                                                            | 1.20<br>(1.10-1.29)            | <0.001  | 1.18<br>(1.08-1.28)            | <0.001  | 1.15<br>(1.05-1.25)            | 0.002   |
| <b>Chloride</b>                                                                                                                                                                                                                                                                                                                                                                                                                                                                                                                                                                                                                                                                                                                                                                             | 1.12<br>(1.02-1.22)            | 0.01    | 1.13<br>(1.03-1.24)            | 0.008   | 1.27<br>(1.05-1.53)            | 0.01    |
| <i>Outcome: All-cause mortality</i>                                                                                                                                                                                                                                                                                                                                                                                                                                                                                                                                                                                                                                                                                                                                                         |                                |         |                                |         |                                |         |
| <b>BUN</b>                                                                                                                                                                                                                                                                                                                                                                                                                                                                                                                                                                                                                                                                                                                                                                                  | 1.22<br>(1.13-1.32)            | <0.001  | 1.15<br>(1.04-1.27)            | 0.005   | 1.17<br>(1.03-1.32)            | 0.02    |
| <b>Creatinine</b>                                                                                                                                                                                                                                                                                                                                                                                                                                                                                                                                                                                                                                                                                                                                                                           | 1.16<br>(1.10-1.23)            | <0.001  | 1.13<br>(1.05-1.22)            | 0.001   | 1.10<br>(0.99-1.19)            | 0.06    |
| <b>Sodium</b>                                                                                                                                                                                                                                                                                                                                                                                                                                                                                                                                                                                                                                                                                                                                                                               | 1.13<br>(1.02-1.24)            | 0.01    | 1.12<br>(1.01-1.24)            | 0.03    | 1.14<br>(0.98-1.34)            | 0.09    |
| <b>Potassium</b>                                                                                                                                                                                                                                                                                                                                                                                                                                                                                                                                                                                                                                                                                                                                                                            | 1.11<br>(1.03-1.21)            | 0.01    | 1.09<br>(1.00-1.18)            | 0.054   | 1.22<br>(1.03-1.40)            | 0.02    |
| <b>Chloride</b>                                                                                                                                                                                                                                                                                                                                                                                                                                                                                                                                                                                                                                                                                                                                                                             | 1.14<br>(1.04-1.25)            | 0.004   | 1.16<br>(1.05-1.28)            | 0.003   | 1.28<br>(1.11-1.47)            | 0.001   |
| <p>BUN, blood urea nitrogen.</p> <p>Model 1 – adjusted for age, sex, race, education level, treatment arm, country of enrollment, and enrollment stratum (either elevated NP levels of HF hospitalization).</p> <p>Model 2 – covariates in Model 1 + BMI, SBP, diabetes status (none, insulin dependent, non-insulin dependent), alcohol use, smoking history, history of atrial fibrillation, ACEi/ARB use (yes/no), history of CVD, New York Heart Association (NYHA) class, and baseline respective laboratory value (either BUN, creatinine, potassium, sodium, or chloride).</p> <p>Model 3 – covariates of Model 2 + percent change in respective laboratory value, variability in SBP and BMI, and spironolactone and loop diuretic medication dose as a time varying covariate.</p> |                                |         |                                |         |                                |         |

**Supplemental Table 5.** Baseline characteristics across quintiles of creatinine variability assessed by ASV.

|                                            | Quintile 1   | Quintile 2   | Quintile 3   | Quintile 4   | Quintile 5   | P-value |
|--------------------------------------------|--------------|--------------|--------------|--------------|--------------|---------|
| n                                          | 651          | 649          | 645          | 633          | 613          |         |
| ASV, mg/dL                                 | 0.04 (0.02)  | 0.07 (0.01)  | 0.11 (0.01)  | 0.17 (0.02)  | 0.33 (0.16)  | <0.01   |
| <b>Demographic</b>                         |              |              |              |              |              |         |
| Age, years                                 | 67.6 (9.2)   | 67.4 (9.6)   | 68.6 (9.3)   | 69.1 (9.6)   | 69.3 (9.7)   | <0.01   |
| Female                                     | 347 (53.3)   | 316 (48.7)   | 348 (54.0)   | 327 (51.7)   | 290 (47.3)   | 0.08    |
| Race                                       |              |              |              |              |              | <0.01   |
| White                                      | 617 (94.8)   | 601 (92.6)   | 585 (90.7)   | 550 (86.9)   | 522 (85.2)   |         |
| Black                                      | 24 ( 3.7)    | 39 ( 6.0)    | 41 ( 6.4)    | 68 (10.7)    | 74 (12.1)    |         |
| Other                                      | 10 ( 1.5)    | 9 ( 1.4)     | 19 ( 2.9)    | 15 ( 2.4)    | 17 ( 2.8)    |         |
| Americas                                   | 217 (33.3)   | 252 (38.8)   | 344 (53.3)   | 389 (61.5)   | 377 (61.5)   | <0.01   |
| Spirolactone treatment arm                 | 305 (46.9)   | 300 (46.2)   | 311 (48.2)   | 328 (51.8)   | 360 (58.7)   | <0.01   |
| <b>Clinical Characteristics</b>            |              |              |              |              |              |         |
| SBP, mmHg                                  | 129.9 (12.6) | 129.7 (13.3) | 129.2 (13.4) | 128.8 (13.9) | 128.7 (15.0) | 0.48    |
| BMI, kg/m <sup>2</sup>                     | 30.8 (6.4)   | 31.5 (6.7)   | 32.0 (6.7)   | 32.7 (7.2)   | 32.7 (7.3)   | <0.01   |
| NYHA class III-IV                          | 182 (28.0)   | 200 (30.8)   | 197 (30.5)   | 206 (32.6)   | 226 (36.9)   | 0.01    |
| Alcoholic drinks per week                  |              |              |              |              |              | 0.68    |
| 0                                          | 520 (79.9)   | 506 (78.0)   | 486 (75.5)   | 490 (77.4)   | 470 (76.7)   |         |
| 1-5                                        | 100 (15.4)   | 107 (16.5)   | 123 (19.1)   | 106 (16.7)   | 114 (18.6)   |         |
| 5-10                                       | 23 ( 3.5)    | 25 ( 3.9)    | 23 ( 3.6)    | 29 ( 4.6)    | 17 ( 2.8)    |         |
| 10+                                        | 8 ( 1.2)     | 11 ( 1.7)    | 11 ( 1.7)    | 8 ( 1.3)     | 12 ( 2.0)    |         |
| Current smoking                            | 75 (11.5)    | 72 (11.1)    | 65 (10.1)    | 47 ( 7.4)    | 73 (11.9)    | 0.12    |
| Variability in SBP                         | 9.5 (6.3)    | 9.9 (7.3)    | 10.9 (7.7)   | 11.6 (8.0)   | 12.0 (8.4)   | <0.01   |
| Variability in BMI                         | 0.5 (0.8)    | 0.6 (0.7)    | 0.5 (0.6)    | 0.6 (0.6)    | 0.7 (0.7)    | <0.01   |
| <b>Medical History</b>                     |              |              |              |              |              |         |
| History of CVD                             | 217 (33.3)   | 228 (35.1)   | 240 (37.2)   | 262 (41.4)   | 270 (44.0)   | <0.01   |
| Atrial fibrillation                        | 221 (33.9)   | 226 (34.8)   | 217 (33.7)   | 241 (38.1)   | 221 (36.1)   | 0.46    |
| Diabetes status                            |              |              |              |              |              | <0.01   |
| None                                       | 495 (76.0)   | 472 (72.7)   | 433 (67.2)   | 424 (67.0)   | 367 (59.9)   |         |
| Insulin dependent                          | 38 ( 5.8)    | 52 ( 8.0)    | 67 (10.4)    | 93 (14.7)    | 123 (20.1)   |         |
| Non-Insulin dependent                      | 118 (18.1)   | 125 (19.3)   | 144 (22.4)   | 116 (18.3)   | 123 (20.1)   |         |
| ACEi/ARB medication                        | 549 (84.3)   | 557 (85.8)   | 518 (80.3)   | 538 (85.1)   | 530 (86.5)   | 0.02    |
| Loop diuretic medication                   | 508 (78.0)   | 511 (78.7)   | 514 (79.7)   | 538 (85.1)   | 533 (86.9)   | <0.01   |
| Average loop diuretic dose at baseline, mg | 53.7 (44.4)  | 57.3 (59.2)  | 66.3 (76.2)  | 78.9 (131.3) | 87.3 (103.2) | <0.01   |



|                                                                                                                                                                                                                                                                                                                                                 |                |                 |                 |                 |                 |       |
|-------------------------------------------------------------------------------------------------------------------------------------------------------------------------------------------------------------------------------------------------------------------------------------------------------------------------------------------------|----------------|-----------------|-----------------|-----------------|-----------------|-------|
| Average loop diuretic dose at month 4, mg                                                                                                                                                                                                                                                                                                       | 74.5 (74.3)    | 57.2 (51.7)     | 89.1 (98.6)     | 98.3 (166.6)    | 101.5 (118.7)   | 0.08  |
| Laboratory                                                                                                                                                                                                                                                                                                                                      |                |                 |                 |                 |                 |       |
| Sodium, mmol/L                                                                                                                                                                                                                                                                                                                                  | 141.8 (4.5)    | 141.3 (9.1)     | 141.0 (4.2)     | 140.7 (7.2)     | 140.7 (4.0)     | 0.01  |
| Potassium, mmol/L                                                                                                                                                                                                                                                                                                                               | 4.3 (0.4)      | 4.3 (0.5)       | 4.3 (0.4)       | 4.2 (0.4)       | 4.2 (0.4)       | 0.54  |
| Chloride, mmol/L                                                                                                                                                                                                                                                                                                                                | 99.2 (20.4)    | 97.3 (25.1)     | 98.6 (21.3)     | 99.1 (19.1)     | 98.9 (19.9)     | 0.48  |
| BUN, mg/dL                                                                                                                                                                                                                                                                                                                                      | 12.9 (10.6)    | 13.9 (12.3)     | 14.9 (14.1)     | 16.7 (13.4)     | 20.3 (15.4)     | <0.01 |
| Creatinine, mg/dL                                                                                                                                                                                                                                                                                                                               | 1.0 (0.2)      | 1.0 (0.2)       | 1.1 (0.3)       | 1.1 (0.3)       | 1.2 (0.4)       | <0.01 |
| Glucose, mg/dL                                                                                                                                                                                                                                                                                                                                  | 108.9 (40.8)   | 110.6 (39.7)    | 115.6 (47.8)    | 114.0 (51.9)    | 121.3 (61.0)    | <0.01 |
| Hemoglobin, g/dL                                                                                                                                                                                                                                                                                                                                | 13.4 (1.8)     | 13.5 (1.9)      | 13.2 (2.5)      | 13.2 (1.9)      | 12.9 (2.4)      | <0.01 |
| BNP, pg/mL                                                                                                                                                                                                                                                                                                                                      | 355.1 (374.3)  | 307.9 (336.0)   | 392.7 (522.4)   | 371.2 (418.9)   | 390.1 (358.7)   | 0.42  |
| NT-proBNP, pg/mL                                                                                                                                                                                                                                                                                                                                | 986.3 (1125.8) | 1411.3 (1718.6) | 1434.7 (2279.3) | 1474.4 (1704.4) | 1870.7 (3253.4) | 0.04  |
| Z-score                                                                                                                                                                                                                                                                                                                                         | -0.1 (0.7)     | -0.1 (0.8)      | 0.0 (1.2)       | -0.0 (0.9)      | 0.1 (1.2)       | 0.06  |
| <i>Abbreviations:</i> ACEi/ARB, angiotensin converting enzyme inhibitor / angiotensin receptor blocker; SBP, systolic blood pressure; BMI, body mass index; NYHA, New York Heart Association; CVD, cardiovascular disease; BUN, blood urea nitrogen; BNP, brain natriuretic peptide; NT-proBNP, N-terminal prohormone brain natriuretic peptide |                |                 |                 |                 |                 |       |

**Supplemental Table 6.** Associations of average successive variability (ASV) among 5 laboratory measures with the primary composite outcome after further adjustment for NP Z-score. Primary composite outcome is a composite of aborted cardiac arrest, hospitalization for management of heart failure, or cardiovascular death.

|                   | <b>Model 4</b>                             |                |
|-------------------|--------------------------------------------|----------------|
|                   | <b>HR per 1-SD higher ASV<br/>(95% CI)</b> | <b>P-value</b> |
| <b>BUN</b>        | 1.26<br>(1.10-1.44)                        | 0.001          |
| <b>Creatinine</b> | 1.29<br>(1.13-1.47)                        | <0.001         |
| <b>Sodium</b>     | 1.32<br>(1.08-1.62)                        | 0.008          |
| <b>Potassium</b>  | 1.22<br>(1.03-1.45)                        | 0.02           |
| <b>Chloride</b>   | 1.24<br>(0.99-1.55)                        | 0.06           |

BUN, blood urea nitrogen.  
Cox Model adjusted for age, sex, race, education level, treatment arm, country of enrollment, enrollment stratum (either elevated NP levels of HF hospitalization), BMI, SBP, diabetes status (none, insulin dependent, non-insulin dependent), alcohol use, smoking history, history of atrial fibrillation, ACEi/ARB use (yes/no), history of CVD, New York Heart Association (NYHA) class, and baseline respective laboratory value (either BUN, creatinine, potassium, sodium, or chloride), percent change in respective laboratory value, variability in SBP and BMI, spironolactone and loop diuretic medication dose as a time varying covariate, and NP Z-score.

**Supplemental Table 7.** Associations of average successive variability (ASV), coefficient of variation (CV), and standard deviation (SD) among 5 laboratory measures with the primary composite outcome in the Americas cohort. The number of events were 379 (28.0%), 419 (26.5%), 419 (26.5%), 420 (26.5%), and 417 (26.5%) for BUN, creatinine, sodium, potassium, and chloride, respectively.<sup>1</sup>

|                                                                                                                                                                                                                                   | Model 1                     |         | Model 2                     |         | Model 3                     |         |
|-----------------------------------------------------------------------------------------------------------------------------------------------------------------------------------------------------------------------------------|-----------------------------|---------|-----------------------------|---------|-----------------------------|---------|
|                                                                                                                                                                                                                                   | HR per 1-SD higher (95% CI) | P-value | HR per 1-SD higher (95% CI) | P-value | HR per 1-SD higher (95% CI) | P-value |
| <i>Variability: ASV</i>                                                                                                                                                                                                           |                             |         |                             |         |                             |         |
| <b>BUN</b>                                                                                                                                                                                                                        | 1.24<br>(1.16-1.33)         | <0.001  | 1.14<br>(1.05-1.24)         | 0.002   | 1.26<br>(1.11-1.44)         | 0.001   |
| <b>Creatinine</b>                                                                                                                                                                                                                 | 1.29<br>(1.20-1.39)         | <0.001  | 1.16<br>(1.07-1.25)         | <0.001  | 1.28<br>(1.12-1.46)         | <0.001  |
| <b>Sodium</b>                                                                                                                                                                                                                     | 1.19<br>(1.09-1.30)         | <0.001  | 1.25<br>(1.10-1.41)         | <0.001  | 1.27<br>(1.03-1.57)         | 0.03    |
| <b>Potassium</b>                                                                                                                                                                                                                  | 1.15<br>(1.06-1.26)         | 0.001   | 1.14<br>(1.04-1.26)         | 0.005   | 1.21<br>(1.01-1.44)         | 0.04    |
| <b>Chloride</b>                                                                                                                                                                                                                   | 1.08<br>(1.00-1.17)         | 0.042   | 1.14<br>(0.99-1.31)         | 0.06    | 1.26<br>(1.01-1.59)         | 0.045   |
| <i>Variability: CV</i>                                                                                                                                                                                                            |                             |         |                             |         |                             |         |
| <b>BUN</b>                                                                                                                                                                                                                        | 1.21<br>(1.11-1.32)         | <0.001  | 1.19<br>(1.09-1.31)         | <0.001  | 1.27<br>(1.12-1.44)         | <0.001  |
| <b>Creatinine</b>                                                                                                                                                                                                                 | 1.24<br>(1.14-1.35)         | <0.001  | 1.17<br>(1.07-1.28)         | <0.001  | 1.17<br>(1.04-1.31)         | 0.007   |
| <b>Sodium</b>                                                                                                                                                                                                                     | 1.25<br>(1.10-1.42)         | <0.001  | 1.24<br>(1.08-1.42)         | 0.002   | 1.16<br>(0.97-1.39)         | 0.11    |
| <b>Potassium</b>                                                                                                                                                                                                                  | 1.18<br>(1.08-1.29)         | <0.001  | 1.16<br>(1.06-1.28)         | 0.002   | 1.08<br>(0.95-1.24)         | 0.25    |
| <b>Chloride</b>                                                                                                                                                                                                                   | 1.21<br>(1.07-1.37)         | 0.002   | 1.22<br>(1.07-1.41)         | 0.004   | 1.28<br>(1.09-1.51)         | 0.003   |
| <i>Variability: SD</i>                                                                                                                                                                                                            |                             |         |                             |         |                             |         |
| <b>BUN</b>                                                                                                                                                                                                                        | 1.25<br>(1.17-1.33)         | <0.001  | 1.17<br>(1.08-1.28)         | <0.001  | 1.26<br>(1.13-1.40)         | <0.001  |
| <b>Creatinine</b>                                                                                                                                                                                                                 | 1.29<br>(1.21-1.37)         | <0.001  | 1.19<br>(1.09-1.29)         | <0.001  | 1.16<br>(1.05-1.27)         | 0.002   |
| <b>Sodium</b>                                                                                                                                                                                                                     | 1.25<br>(1.09-1.42)         | 0.001   | 1.24<br>(1.08-1.42)         | 0.002   | 1.15<br>(0.96-1.38)         | 0.13    |
| <b>Potassium</b>                                                                                                                                                                                                                  | 1.18<br>(1.08-1.29)         | <0.001  | 1.16<br>(1.06-1.28)         | 0.001   | 1.08<br>(0.94-1.23)         | 0.30    |
| <b>Chloride</b>                                                                                                                                                                                                                   | 1.19<br>(1.06-1.34)         | 0.003   | 1.22<br>(1.06-1.39)         | 0.004   | 1.27<br>(1.08-1.46)         | 0.008   |
| <p>BUN, blood urea nitrogen.<br/>                     Model 1 – adjusted for age, sex, race, education level, treatment arm, country of enrollment, and enrollment stratum (either elevated NP levels of HF hospitalization).</p> |                             |         |                             |         |                             |         |

Model 2 – covariates in Model 1 + BMI, SBP, diabetes status (none, insulin dependent, non-insulin dependent), alcohol use, smoking history, history of atrial fibrillation, ACEi/ARB use (yes/no), history of CVD, New York Heart Association (NYHA) class, and baseline respective laboratory value (either BUN, creatinine, potassium, sodium, or chloride).

Model 3 – covariates of Model 2 + percent change in respective laboratory value, variability in SBP and BMI, and spironolactone and loop diuretic medication dose as a time varying covariate.

**Supplemental Table 8.** Associations of ASV among 5 laboratory measures with the primary composite outcome in the placebo (top) and spironolactone (bottom) treatment arms.

|                                     | Model 1                         |         | Model 2                         |         | Model 3                         |         |
|-------------------------------------|---------------------------------|---------|---------------------------------|---------|---------------------------------|---------|
|                                     | HR per 1-SD higher ASV (95% CI) | P-value | HR per 1-SD higher ASV (95% CI) | P-value | HR per 1-SD higher ASV (95% CI) | P-value |
| <i>Placebo treatment arm</i>        |                                 |         |                                 |         |                                 |         |
| <b>BUN</b>                          | 1.21<br>(1.12-1.31)             | <0.001  | 1.23<br>(1.09-1.39)             | 0.001   | 1.27<br>(1.04-1.56)             | 0.02    |
| <b>Creatinine</b>                   | 1.18<br>(1.08-1.29)             | <0.001  | 1.14<br>(1.01-1.29)             | 0.03    | 1.39<br>(1.14-1.69)             | 0.001   |
| <b>Sodium</b>                       | 1.17<br>(1.03-1.34)             | 0.02    | 1.14<br>(0.99-1.31)             | 0.05    | 1.52<br>(1.03-2.26)             | 0.04    |
| <b>Potassium</b>                    | 1.14<br>(1.02-1.28)             | 0.02    | 1.13<br>(1.00-1.27)             | 0.049   | 1.39<br>(1.08-1.79)             | 0.01    |
| <b>Chloride</b>                     | 1.14<br>(1.01-1.28)             | 0.03    | 1.15<br>(1.00-1.32)             | 0.043   | 1.38<br>(0.94-2.02)             | 0.09    |
| <i>Spironolactone treatment arm</i> |                                 |         |                                 |         |                                 |         |
| <b>BUN</b>                          | 1.22<br>(1.12-1.32)             | <0.001  | 1.12<br>(1.01-1.24)             | 0.03    | 1.30<br>(1.03-1.65)             | 0.02    |
| <b>Creatinine</b>                   | 1.28<br>(1.19-1.37)             | <0.001  | 1.17<br>(1.08-1.28)             | <0.001  | 1.19<br>(1.02-1.42)             | 0.03    |
| <b>Sodium</b>                       | 1.19<br>(1.05-1.34)             | 0.005   | 1.20<br>(1.05-1.36)             | 0.005   | 1.22<br>(1.05-1.49)             | 0.01    |
| <b>Potassium</b>                    | 1.19<br>(1.07-1.31)             | 0.001   | 1.18<br>(1.06-1.32)             | 0.003   | 1.16<br>(1.00-1.41)             | 0.045   |
| <b>Chloride</b>                     | 1.05<br>(0.92-1.20)             | 0.46    | 1.07<br>(0.93-1.23)             | 0.36    | 1.20<br>(0.87-1.66)             | 0.26    |

BUN, blood urea nitrogen.

Model 1 – adjusted for age, sex, race, education level, treatment arm, country of enrollment, and enrollment stratum (either elevated NP levels of HF hospitalization).

Model 2 – covariates in Model 1 + BMI, SBP, diabetes status (none, insulin dependent, non-insulin dependent), alcohol use, smoking history, history of atrial fibrillation, ACEi/ARB use (yes/no), history of CVD, New York Heart Association (NYHA) class, and baseline respective laboratory value (either BUN, creatinine, potassium, sodium, or chloride).

Model 3 – covariates of Model 2 + percent change in respective laboratory value, variability in SBP and BMI, and spironolactone and loop diuretic medication dose as a time varying covariate.

**Supplemental Table 9.** Sensitivity analyses: Associations of ASV in renal function laboratory measures with the primary composite outcome among tertiles of the MAGGIC risk score.

|                                                                                                                                                                                                                                                                                                                       | Tertile 1                       |         | Tertile 2                       |         | Tertile 3                       |         |
|-----------------------------------------------------------------------------------------------------------------------------------------------------------------------------------------------------------------------------------------------------------------------------------------------------------------------|---------------------------------|---------|---------------------------------|---------|---------------------------------|---------|
|                                                                                                                                                                                                                                                                                                                       | HR per 1-SD higher ASV (95% CI) | P-value | HR per 1-SD higher ASV (95% CI) | P-value | HR per 1-SD higher ASV (95% CI) | P-value |
| <b>BUN</b>                                                                                                                                                                                                                                                                                                            | 1.14<br>(1.01-1.29)             | 0.03    | 1.52<br>(1.26-1.83)             | <0.001  | 1.19<br>(1.02-1.38)             | 0.02    |
| <b>Creatinine</b>                                                                                                                                                                                                                                                                                                     | 1.35<br>(1.16-1.57)             | <0.001  | 1.15<br>(1.01-1.31)             | 0.041   | 1.21<br>(1.04-1.41)             | 0.01    |
| <p>BUN, blood urea nitrogen<br/>           Model was adjusted for treatment arm, country of enrollment, alcohol use, history of atrial fibrillation, percent change in respective laboratory value, variability in SBP and BMI, and spironolactone and loop diuretic medication dose as a time varying covariate.</p> |                                 |         |                                 |         |                                 |         |

**Supplemental Table 10.** Comparison of Cox proportional hazard model discrimination (Harrell’s C-statistic) for predicting all-cause mortality with MAGGIC risk score and addition of percent change or ASV in kidney function parameters. Comparison between models was determined using the De Long’s test.

|                                                               | MAGGIC risk score alone | MAGGIC risk score + percent change in laboratory measure | MAGGIC risk score + ASV in laboratory measure | P-value comparison (MAGGIC risk score alone vs. MAGGIC risk score + percent change) | P-value comparison (MAGGIC risk score alone vs. MAGGIC risk score + ASV) |
|---------------------------------------------------------------|-------------------------|----------------------------------------------------------|-----------------------------------------------|-------------------------------------------------------------------------------------|--------------------------------------------------------------------------|
| BUN                                                           | 0.64                    | 0.64                                                     | 0.67                                          | p=0.35                                                                              | p<0.001                                                                  |
| Creatinine                                                    | 0.65                    | 0.65                                                     | 0.67                                          | P=0.22                                                                              | p<0.001                                                                  |
| ASV, average successive variability; BUN, blood urea nitrogen |                         |                                                          |                                               |                                                                                     |                                                                          |

**Supplemental Table 11.** Baseline characteristics across quintiles of sodium variability assessed by ASV.

|                                 | Quintile 1   | Quintile 2   | Quintile 3   | Quintile 4   | Quintile 5   | P-value |
|---------------------------------|--------------|--------------|--------------|--------------|--------------|---------|
| n                               | 868          | 648          | 513          | 612          | 552          |         |
| ASV, mEq/L                      | 1.0 (0.4)    | 1.8 (0.2)    | 2.5 (0.2)    | 3.4 (0.4)    | 6.1 (1.9)    | <0.01   |
| <b>Demographic</b>              |              |              |              |              |              |         |
| Age, years                      | 69.3 (9.8)   | 69.2 (9.4)   | 68.1 (9.3)   | 68.1 (9.5)   | 66.6 (9.2)   | <0.01   |
| Female                          | 431 (49.7)   | 336 (51.9)   | 256 (49.9)   | 308 (50.3)   | 296 (53.6)   | 0.61    |
| Race                            |              |              |              |              |              | <0.01   |
| White                           | 773 (89.1)   | 585 (90.3)   | 449 (87.5)   | 545 (89.1)   | 525 (95.1)   |         |
| Black                           | 77 ( 8.9)    | 48 ( 7.4)    | 53 (10.3)    | 52 ( 8.5)    | 16 ( 2.9)    |         |
| Other                           | 18 ( 2.1)    | 15 ( 2.3)    | 11 ( 2.1)    | 15 ( 2.5)    | 11 ( 2.0)    |         |
| Americas                        | 542 (62.4)   | 368 (56.8)   | 256 (49.9)   | 277 (45.3)   | 139 (25.2)   | <0.01   |
| Spironolactone treatment arm    | 428 (49.3)   | 327 (50.5)   | 234 (45.6)   | 335 (54.7)   | 284 (51.4)   | 0.04    |
| <b>Clinical Characteristics</b> |              |              |              |              |              |         |
| SBP, mmHg                       | 128.2 (13.8) | 130.3 (14.1) | 129.0 (14.3) | 129.2 (13.3) | 130.2 (12.2) | 0.03    |
| BMI, kg/m <sup>2</sup>          | 32.2 (7.1)   | 32.3 (7.0)   | 31.8 (6.7)   | 31.8 (7.2)   | 31.5 (6.2)   | 0.20    |
| NYHA class III-IV               | 267 (30.8)   | 198 (30.6)   | 179 (34.9)   | 197 (32.2)   | 169 (30.6)   | 0.48    |
| Alcoholic drinks per week       |              |              |              |              |              | 0.29    |
| 0                               | 644 (74.2)   | 514 (79.3)   | 400 (78.1)   | 483 (78.9)   | 431 (78.1)   |         |
| 1-5                             | 161 (18.5)   | 105 (16.2)   | 86 (16.8)    | 103 (16.8)   | 96 (17.4)    |         |
| 5-10                            | 45 ( 5.2)    | 18 ( 2.8)    | 18 ( 3.5)    | 19 ( 3.1)    | 17 ( 3.1)    |         |
| 10+                             | 18 ( 2.1)    | 11 ( 1.7)    | 7 ( 1.4)     | 7 ( 1.1)     | 8 ( 1.4)     |         |
| Current smoking                 | 79 ( 9.1)    | 56 ( 8.6)    | 59 (11.5)    | 67 (10.9)    | 72 (13.0)    | 0.08    |
| Variability in SBP              | 11.5 (8.0)   | 10.9 (7.1)   | 11.2 (7.9)   | 10.3 (7.7)   | 9.6 (7.2)    | <0.01   |
| Variability in BMI              | 0.6 (0.8)    | 0.6 (0.7)    | 0.5 (0.6)    | 0.6 (0.6)    | 0.6 (0.8)    | 0.62    |
| <b>Medical History</b>          |              |              |              |              |              |         |
| History of CVD                  | 342 (39.4)   | 276 (42.6)   | 210 (40.9)   | 231 (37.7)   | 161 (29.2)   | <0.01   |
| Atrial fibrillation             | 347 (40.0)   | 230 (35.5)   | 186 (36.3)   | 200 (32.7)   | 161 (29.2)   | <0.01   |
| Diabetes status                 |              |              |              |              |              | <0.01   |
| None                            | 583 (67.2)   | 450 (69.4)   | 332 (64.8)   | 406 (66.3)   | 417 (75.5)   |         |
| Insulin dependent               | 111 (12.8)   | 78 (12.0)    | 58 (11.3)    | 81 (13.2)    | 46 ( 8.3)    |         |
| Non-Insulin dependent           | 174 (20.0)   | 120 (18.5)   | 122 (23.8)   | 125 (20.4)   | 89 (16.1)    |         |
| ACEi/ARB medication             | 716 (82.5)   | 545 (84.2)   | 438 (85.4)   | 520 (85.0)   | 477 (86.4)   | 0.33    |
| Loop diuretic medication        | 726 (83.6)   | 545 (84.2)   | 423 (82.5)   | 506 (82.7)   | 406 (73.6)   | <0.01   |



|                                                                                                                                                                                                                                                                                                                                                 |                 |                 |                 |                 |                 |       |
|-------------------------------------------------------------------------------------------------------------------------------------------------------------------------------------------------------------------------------------------------------------------------------------------------------------------------------------------------|-----------------|-----------------|-----------------|-----------------|-----------------|-------|
| Average loop diuretic dose at baseline, mg                                                                                                                                                                                                                                                                                                      | 77.5 (128.0)    | 69.9 (77.6)     | 68.6 (74.2)     | 69.3 (73.3)     | 58.5 (64.2)     | 0.35  |
| Average loop diuretic dose at month 4, mg                                                                                                                                                                                                                                                                                                       | 93.3 (156.1)    | 89.8 (103.5)    | 84.4 (87.7)     | 88.8 (97.9)     | 71.7 (62.5)     | 0.83  |
| <b>Laboratory</b>                                                                                                                                                                                                                                                                                                                               |                 |                 |                 |                 |                 |       |
| Sodium, mmol/L                                                                                                                                                                                                                                                                                                                                  | 141.0 (6.0)     | 140.8 (7.1)     | 141.4 (4.2)     | 141.1 (7.2)     | 141.4 (5.3)     | 0.38  |
| Potassium, mmol/L                                                                                                                                                                                                                                                                                                                               | 4.2 (0.5)       | 4.3 (0.4)       | 4.3 (0.4)       | 4.3 (0.5)       | 4.3 (0.5)       | 0.26  |
| Chloride, mmol/L                                                                                                                                                                                                                                                                                                                                | 99.8 (18.4)     | 98.4 (22.0)     | 98.4 (22.2)     | 98.2 (21.3)     | 97.7 (23.5)     | 0.42  |
| BUN, mg/dL                                                                                                                                                                                                                                                                                                                                      | 17.6 (12.7)     | 16.8 (13.2)     | 15.5 (13.4)     | 15.0 (13.9)     | 12.5 (14.3)     | <0.01 |
| Creatinine, mg/dL                                                                                                                                                                                                                                                                                                                               | 1.1 (0.3)       | 1.1 (0.3)       | 1.1 (0.3)       | 1.1 (0.3)       | 1.1 (0.3)       | 0.01  |
| Glucose, mg/dL                                                                                                                                                                                                                                                                                                                                  | 111.6 (44.3)    | 115.3 (49.7)    | 116.3 (49.2)    | 115.3 (52.2)    | 112.6 (50.0)    | 0.32  |
| Hemoglobin, g/dL                                                                                                                                                                                                                                                                                                                                | 13.1 (2.2)      | 13.2 (1.9)      | 13.2 (2.0)      | 13.3 (2.4)      | 13.6 (1.9)      | <0.01 |
| BNP, pg/mL                                                                                                                                                                                                                                                                                                                                      | 377.8 (487.6)   | 340.2 (328.9)   | 336.6 (385.4)   | 356.8 (342.6)   | 420.5 (438.2)   | 0.53  |
| NT-proBNP, pg/mL                                                                                                                                                                                                                                                                                                                                | 1406.0 (1823.4) | 1300.0 (1599.8) | 1434.2 (1378.1) | 1879.5 (3630.0) | 1026.4 (1071.4) | 0.08  |
| Z-score                                                                                                                                                                                                                                                                                                                                         | -0.0 (1.0)      | -0.1 (0.8)      | -0.1 (0.8)      | 0.1 (1.3)       | -0.0 (0.9)      | 0.54  |
| <i>Abbreviations:</i> ACEi/ARB, angiotensin converting enzyme inhibitor / angiotensin receptor blocker; SBP, systolic blood pressure; BMI, body mass index; NYHA, New York Heart Association; CVD, cardiovascular disease; BUN, blood urea nitrogen; BNP, brain natriuretic peptide; NT-proBNP, N-terminal prohormone brain natriuretic peptide |                 |                 |                 |                 |                 |       |

**Supplemental Table 12.** Baseline characteristics across quintiles of potassium variability assessed by ASV.

|                                 | Quintile 1   | Quintile 2   | Quintile 3   | Quintile 4   | Quintile 5   | P-value |
|---------------------------------|--------------|--------------|--------------|--------------|--------------|---------|
| n                               | 667          | 682          | 598          | 624          | 624          |         |
| ASV, mEq/L                      | 0.12 (0.04)  | 0.22 (0.03)  | 0.31 (0.03)  | 0.43 (0.04)  | 0.68 (0.18)  | <0.01   |
| <b>Demographic</b>              |              |              |              |              |              |         |
| Age, years                      | 68.1 (9.3)   | 68.4 (9.4)   | 68.1 (9.6)   | 68.3 (9.7)   | 69.1 (9.6)   | 0.29    |
| Female                          | 349 (52.3)   | 349 (51.2)   | 284 (47.5)   | 327 (52.4)   | 320 (51.3)   | 0.42    |
| Race                            |              |              |              |              |              | 0.04    |
| White                           | 616 (92.4)   | 618 (90.6)   | 528 (88.3)   | 559 (89.6)   | 557 (89.3)   |         |
| Black                           | 35 ( 5.2)    | 52 ( 7.6)    | 52 ( 8.7)    | 48 ( 7.7)    | 60 ( 9.6)    |         |
| Other                           | 16 ( 2.4)    | 12 ( 1.8)    | 18 ( 3.0)    | 17 ( 2.7)    | 7 ( 1.1)     |         |
| Americas                        | 302 (45.3)   | 327 (47.9)   | 317 (53.0)   | 315 (50.5)   | 323 (51.8)   | 0.04    |
| Spironolactone treatment arm    | 297 (44.5)   | 337 (49.4)   | 312 (52.2)   | 333 (53.4)   | 329 (52.7)   | 0.01    |
| <b>Clinical Characteristics</b> |              |              |              |              |              |         |
| SBP, mmHg                       | 130.0 (13.5) | 129.3 (13.4) | 128.8 (13.8) | 129.4 (13.7) | 128.8 (13.8) | 0.51    |
| BMI, kg/m <sup>2</sup>          | 31.8 (6.9)   | 31.6 (6.4)   | 32.1 (6.9)   | 32.3 (7.0)   | 32.0 (7.2)   | 0.55    |
| NYHA class III-IV               | 179 (26.8)   | 191 (28.0)   | 197 (32.9)   | 204 (32.7)   | 240 (38.5)   | <0.01   |
| Alcoholic drinks per week       |              |              |              |              |              | 0.32    |
| 0                               | 516 (77.4)   | 530 (77.8)   | 445 (74.4)   | 495 (79.3)   | 488 (78.2)   |         |
| 1-5                             | 124 (18.6)   | 113 (16.6)   | 110 (18.4)   | 96 (15.4)    | 108 (17.3)   |         |
| 5-10                            | 18 ( 2.7)    | 24 ( 3.5)    | 28 ( 4.7)    | 25 ( 4.0)    | 22 ( 3.5)    |         |
| 10+                             | 9 ( 1.3)     | 14 ( 2.1)    | 15 ( 2.5)    | 7 ( 1.1)     | 6 ( 1.0)     |         |
| Current smoking                 | 55 ( 8.2)    | 70 (10.3)    | 70 (11.7)    | 70 (11.2)    | 68 (10.9)    | 0.33    |
| Variability in SBP              | 9.9 (7.4)    | 10.5 (7.7)   | 11.2 (7.5)   | 10.9 (7.6)   | 11.4 (7.9)   | <0.01   |
| Variability in BMI              | 0.5 (0.8)    | 0.5 (0.6)    | 0.6 (0.7)    | 0.6 (0.6)    | 0.7 (0.8)    | <0.01   |
| <b>Medical History</b>          |              |              |              |              |              |         |
| History of CVD                  | 253 (37.9)   | 260 (38.1)   | 247 (41.3)   | 242 (38.8)   | 219 (35.1)   | 0.52    |
| Atrial fibrillation             | 224 (33.6)   | 225 (33.0)   | 208 (34.8)   | 230 (36.9)   | 237 (38.0)   | 0.28    |
| Diabetes status                 |              |              |              |              |              | 0.04    |
| None                            | 469 (70.3)   | 480 (70.5)   | 419 (70.1)   | 410 (65.7)   | 411 (65.9)   |         |
| Insulin dependent               | 64 ( 9.6)    | 64 ( 9.4)    | 70 (11.7)    | 85 (13.6)    | 92 (14.7)    |         |
| Non-Insulin dependent           | 134 (20.1)   | 137 (20.1)   | 109 (18.2)   | 129 (20.7)   | 121 (19.4)   |         |
| ACEi/ARB medication             | 558 (83.7)   | 571 (83.7)   | 502 (84.1)   | 533 (85.4)   | 533 (85.4)   | 0.82    |
| Loop diuretic medication        | 554 (83.1)   | 542 (79.5)   | 481 (80.6)   | 510 (81.7)   | 520 (83.3)   | 0.32    |

|                                                                                                                                                                                                                                                                                                                                                 |                 |                 |                 |                 |                 |       |
|-------------------------------------------------------------------------------------------------------------------------------------------------------------------------------------------------------------------------------------------------------------------------------------------------------------------------------------------------|-----------------|-----------------|-----------------|-----------------|-----------------|-------|
| Average loop diuretic dose at baseline, mg                                                                                                                                                                                                                                                                                                      | 65.1 (68.5)     | 72.6 (87.6)     | 65.4 (77.1)     | 74.6 (138.0)    | 74.3 (73.0)     | 0.68  |
| Average loop diuretic dose at month 4, mg                                                                                                                                                                                                                                                                                                       | 70.3 (49.6)     | 105.2 (122.3)   | 80.7 (104.0)    | 93.1 (170.9)    | 90.3 (95.0)     | 0.33  |
| Laboratory                                                                                                                                                                                                                                                                                                                                      |                 |                 |                 |                 |                 |       |
| Sodium, mmol/L                                                                                                                                                                                                                                                                                                                                  | 141.5 (4.3)     | 141.6 (4.0)     | 140.8 (7.2)     | 140.9 (7.2)     | 140.6 (7.3)     | 0.01  |
| Potassium, mmol/L                                                                                                                                                                                                                                                                                                                               | 4.3 (0.4)       | 4.2 (0.4)       | 4.2 (0.5)       | 4.3 (0.5)       | 4.2 (0.5)       | 0.01  |
| Chloride, mmol/L                                                                                                                                                                                                                                                                                                                                | 98.4 (20.7)     | 98.1 (22.7)     | 97.7 (23.1)     | 98.5 (22.3)     | 100.2 (16.8)    | 0.28  |
| BUN, mg/dL                                                                                                                                                                                                                                                                                                                                      | 15.5 (13.1)     | 14.6 (12.9)     | 15.8 (13.1)     | 16.2 (14.2)     | 16.5 (14.2)     | 0.10  |
| Creatinine, mg/dL                                                                                                                                                                                                                                                                                                                               | 1.0 (0.3)       | 1.1 (0.3)       | 1.1 (0.3)       | 1.1 (0.3)       | 1.1 (0.3)       | <0.01 |
| Glucose, mg/dL                                                                                                                                                                                                                                                                                                                                  | 113.6 (49.0)    | 110.3 (39.6)    | 112.9 (49.1)    | 117.1 (54.6)    | 116.7 (51.8)    | 0.07  |
| Hemoglobin, g/dL                                                                                                                                                                                                                                                                                                                                | 13.3 (1.7)      | 13.2 (2.2)      | 13.3 (2.1)      | 13.3 (2.1)      | 13.1 (2.4)      | 0.22  |
| BNP, pg/mL                                                                                                                                                                                                                                                                                                                                      | 384.5 (548.8)   | 314.9 (287.3)   | 374.3 (418.9)   | 396.0 (434.0)   | 365.7 (337.7)   | 0.51  |
| NT-proBNP, pg/mL                                                                                                                                                                                                                                                                                                                                | 1396.1 (1959.5) | 1249.5 (1626.5) | 1316.1 (1983.9) | 1322.9 (1281.8) | 1852.3 (3248.3) | 0.20  |
| Z-score                                                                                                                                                                                                                                                                                                                                         | -0.0 (1.1)      | -0.1 (0.7)      | -0.0 (1.0)      | -0.0 (0.9)      | 0.1 (1.1)       | 0.27  |
| <i>Abbreviations:</i> ACEi/ARB, angiotensin converting enzyme inhibitor / angiotensin receptor blocker; SBP, systolic blood pressure; BMI, body mass index; NYHA, New York Heart Association; CVD, cardiovascular disease; BUN, blood urea nitrogen; BNP, brain natriuretic peptide; NT-proBNP, N-terminal prohormone brain natriuretic peptide |                 |                 |                 |                 |                 |       |

**Supplemental Table 13.** Baseline characteristics across quintiles of chloride variability assessed by ASV.

|                                 | Quintile 1   | Quintile 2   | Quintile 3   | Quintile 4   | Quintile 5   | P-value |
|---------------------------------|--------------|--------------|--------------|--------------|--------------|---------|
| n                               | 775          | 614          | 648          | 458          | 598          |         |
| ASV, mEq/L                      | 1.0 (0.4)    | 1.8 (0.2)    | 2.6 (0.3)    | 3.7 (0.4)    | 7.7 (4.0)    | <0.01   |
| <b>Demographic</b>              |              |              |              |              |              |         |
| Age, years                      | 68.6 (9.6)   | 69.6 (9.6)   | 68.9 (9.9)   | 68.1 (9.4)   | 67.0 (9.1)   | <0.01   |
| Female                          | 364 (47.0)   | 314 ( 51.1)  | 328 (50.6)   | 257 (56.1)   | 318 (53.2)   | 0.03    |
| Race                            |              |              |              |              |              | 0.04    |
| White                           | 702 (90.6)   | 551 ( 89.7)  | 560 (86.4)   | 413 (90.2)   | 552 (92.3)   |         |
| Black                           | 56 ( 7.2)    | 49 ( 8.0)    | 64 ( 9.9)    | 37 ( 8.1)    | 39 ( 6.5)    |         |
| Other                           | 17 ( 2.2)    | 14 ( 2.3)    | 24 ( 3.7)    | 8 ( 1.7)     | 7 ( 1.2)     |         |
| Americas                        | 433 (55.9)   | 370 ( 60.3)  | 380 (58.6)   | 215 (46.9)   | 176 (29.4)   | <0.01   |
| Spironolactone treatment arm    | 397 (51.2)   | 286 ( 46.6)  | 320 (49.4)   | 241 (52.6)   | 313 (52.3)   | 0.21    |
| <b>Clinical Characteristics</b> |              |              |              |              |              |         |
| SBP, mmHg                       | 129.2 (13.8) | 129.0 (13.8) | 128.7 (15.0) | 130.4 (13.0) | 129.4 (12.4) | 0.33    |
| BMI, kg/m <sup>2</sup>          | 31.9 (6.9)   | 32.0 (7.6)   | 32.3 (7.1)   | 32.4 (6.7)   | 31.4 (6.3)   | 0.12    |
| NYHA class III-IV               | 229 (29.6)   | 201 ( 32.7)  | 211 (32.6)   | 143 (31.2)   | 177 (29.6)   | 0.58    |
| Alcoholic drinks per week       |              |              |              |              |              | 0.30    |
| 0                               | 583 (75.2)   | 466 ( 76.0)  | 504 (77.8)   | 352 (76.9)   | 480 (80.3)   |         |
| 1-5                             | 141 (18.2)   | 116 ( 18.9)  | 105 (16.2)   | 77 (16.8)    | 100 (16.7)   |         |
| 5-10                            | 32 ( 4.1)    | 20 ( 3.3)    | 30 ( 4.6)    | 22 ( 4.8)    | 12 ( 2.0)    |         |
| 10+                             | 18 ( 2.3)    | 11 ( 1.8)    | 9 ( 1.4)     | 7 ( 1.5)     | 6 ( 1.0)     |         |
| Current smoking                 | 76 ( 9.8)    | 52 ( 8.5)    | 58 ( 9.0)    | 48 (10.5)    | 82 (13.7)    | 0.08    |
| Variability in SBP              | 11.0 (7.8)   | 11.4 (7.9)   | 11.1 (7.6)   | 11.1 (8.0)   | 9.6 (7.0)    | <0.01   |
| Variability in BMI              | 0.5 (0.6)    | 0.6 (0.7)    | 0.6 (0.6)    | 0.6 (1.0)    | 0.6 (0.9)    | 0.15    |
| <b>Medical History</b>          |              |              |              |              |              |         |
| History of CVD                  | 296 (38.2)   | 239 ( 38.9)  | 243 (37.5)   | 169 (36.9)   | 216 (36.1)   | 0.90    |
| Atrial fibrillation             | 299 (38.6)   | 219 ( 35.7)  | 235 (36.3)   | 163 (35.6)   | 175 (29.3)   | 0.01    |
| Diabetes status                 |              |              |              |              |              | 0.03    |
| None                            | 539 (69.5)   | 412 ( 67.2)  | 415 (64.0)   | 304 (66.4)   | 443 (74.1)   |         |
| Insulin dependent               | 87 (11.2)    | 75 ( 12.2)   | 94 (14.5)    | 57 (12.4)    | 55 ( 9.2)    |         |
| Non-Insulin dependent           | 149 (19.2)   | 126 ( 20.6)  | 139 (21.5)   | 97 (21.2)    | 100 (16.7)   |         |
| ACEi/ARB medication             | 645 (83.3)   | 517 (84.2)   | 543 (83.8)   | 390 (85.2)   | 512 (85.6)   | 0.79    |
| Loop diuretic medication        | 644 (83.2)   | 515 (83.9)   | 556 (85.8)   | 379 (82.8)   | 453 (75.8)   | <0.01   |

|                                                                                                                                                                                                                                                                                                                                                 |                 |                 |                 |                 |                 |       |
|-------------------------------------------------------------------------------------------------------------------------------------------------------------------------------------------------------------------------------------------------------------------------------------------------------------------------------------------------|-----------------|-----------------|-----------------|-----------------|-----------------|-------|
| Average loop diuretic dose at baseline, mg                                                                                                                                                                                                                                                                                                      | 70.7 (99.8)     | 69.9 (84.9)     | 73.4 (114.6)    | 72.2 (85.4)     | 69.8 (66.9)     | 0.99  |
| Average loop diuretic dose at month 4, mg                                                                                                                                                                                                                                                                                                       | 87.7 (107.6)    | 81.6 (93.6)     | 90.3 (157.7)    | 101.3 (116.7)   | 88.6 (89.3)     | 0.89  |
| <b>Laboratory</b>                                                                                                                                                                                                                                                                                                                               |                 |                 |                 |                 |                 |       |
| Sodium, mmol/L                                                                                                                                                                                                                                                                                                                                  | 141.4 (4.0)     | 140.5 (9.2)     | 140.9 (3.9)     | 141.1 (8.0)     | 141.5 (5.0)     | 0.02  |
| Potassium, mmol/L                                                                                                                                                                                                                                                                                                                               | 4.3 (0.4)       | 4.2 (0.5)       | 4.2 (0.4)       | 4.2 (0.5)       | 4.2 (0.5)       | 0.10  |
| Chloride, mmol/L                                                                                                                                                                                                                                                                                                                                | 101.9 (10.3)    | 102.0 (10.6)    | 101.6 (11.3)    | 102.0 (10.5)    | 100.9 (12.9)    | 0.41  |
| BUN, mg/dL                                                                                                                                                                                                                                                                                                                                      | 16.0 (11.6)     | 17.6 (14.5)     | 17.1 (13.5)     | 14.8 (14.0)     | 13.6 (13.7)     | <0.01 |
| Creatinine, mg/dL                                                                                                                                                                                                                                                                                                                               | 1.1 (0.3)       | 1.1 (0.3)       | 1.1 (0.3)       | 1.1 (0.3)       | 1.1 (0.3)       | 0.04  |
| Glucose, mg/dL                                                                                                                                                                                                                                                                                                                                  | 111.0 (41.8)    | 113.1 (45.4)    | 117.1 (55.8)    | 117.6 (50.1)    | 113.4 (50.7)    | 0.08  |
| Hemoglobin, g/dL                                                                                                                                                                                                                                                                                                                                | 13.3 (2.3)      | 13.2 (1.9)      | 13.1 (2.6)      | 13.4 (1.7)      | 13.3 (1.9)      | 0.05  |
| BNP, pg/mL                                                                                                                                                                                                                                                                                                                                      | 362.8 (387.2)   | 331.1 (321.5)   | 324.3 (320.1)   | 460.7 (594.6)   | 390.7 (459.0)   | 0.07  |
| NT-proBNP, pg/mL                                                                                                                                                                                                                                                                                                                                | 1426.8 (1882.5) | 1469.4 (1536.1) | 1644.9 (2777.7) | 1350.0 (1903.6) | 1230.7 (2606.7) | 0.73  |
| Z-score                                                                                                                                                                                                                                                                                                                                         | -0.0 (0.9)      | -0.1 (0.7)      | -0.0 (1.0)      | 0.1 (1.2)       | -0.0 (1.1)      | 0.54  |
| <i>Abbreviations:</i> ACEi/ARB, angiotensin converting enzyme inhibitor / angiotensin receptor blocker; SBP, systolic blood pressure; BMI, body mass index; NYHA, New York Heart Association; CVD, cardiovascular disease; BUN, blood urea nitrogen; BNP, brain natriuretic peptide; NT-proBNP, N-terminal prohormone brain natriuretic peptide |                 |                 |                 |                 |                 |       |

**Supplemental Figure 1.** The mean **A)** sodium, **B)** potassium, **C)** chloride, **D)** blood urea nitrogen (BUN), and **E)** creatinine for each visit.

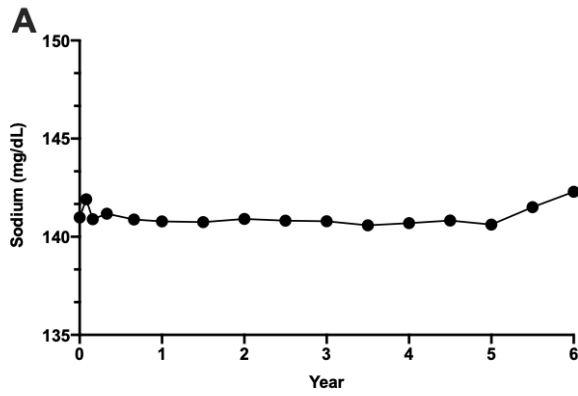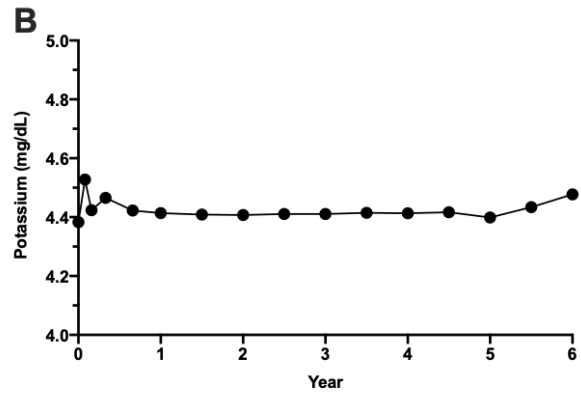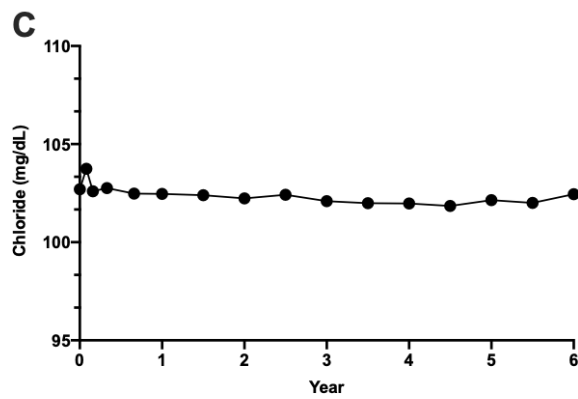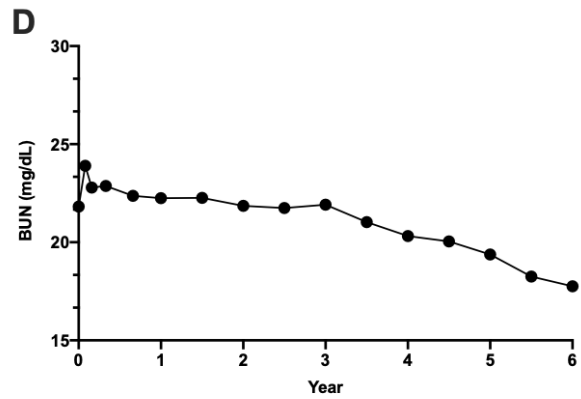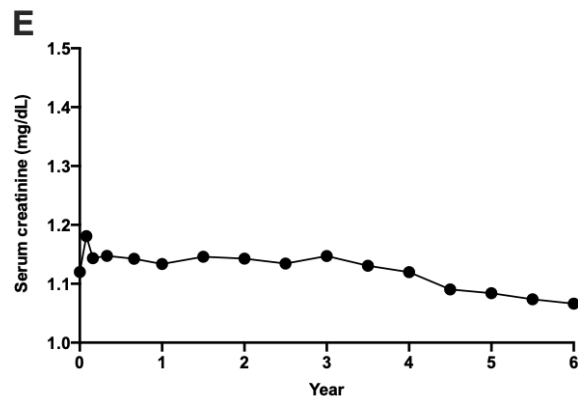

**Supplemental Figure 2.** Sensitivity analyses: Associations of average successive variability (ASV) among kidney laboratory measures (blood urea nitrogen [BUN] and creatinine) from enrollment baseline to month 12 and from month 4 to month 12 with the primary composite outcome in the fully adjusted multivariable Cox proportional hazard model. Primary composite outcome is a composite of aborted cardiac arrest, hospitalization for management of heart failure, or cardiovascular death.

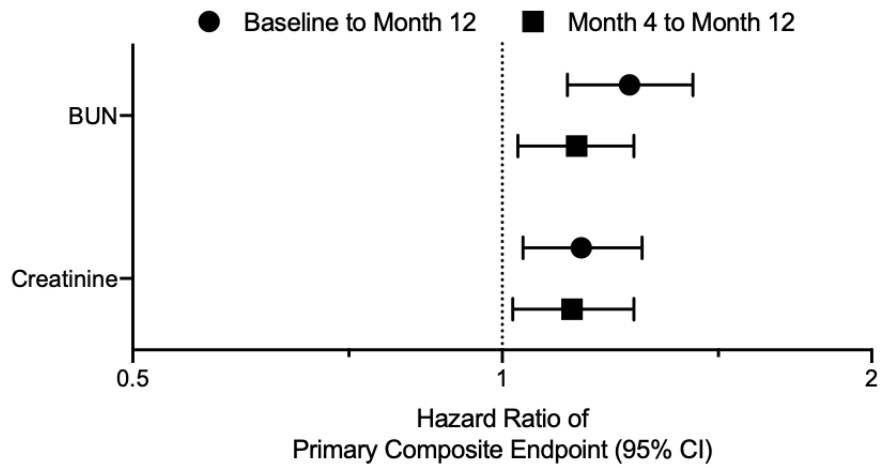

**Supplemental Figure 3.** Sensitivity analyses: **A)** blood urea nitrogen (BUN) and **B)** creatinine variability and risk of primary composite outcome across tertiles of the MAGGIC risk score. High/Low variability indicates variability above/below the median. Primary composite outcome is a composite of aborted cardiac arrest, hospitalization for management of heart failure, or cardiovascular death.

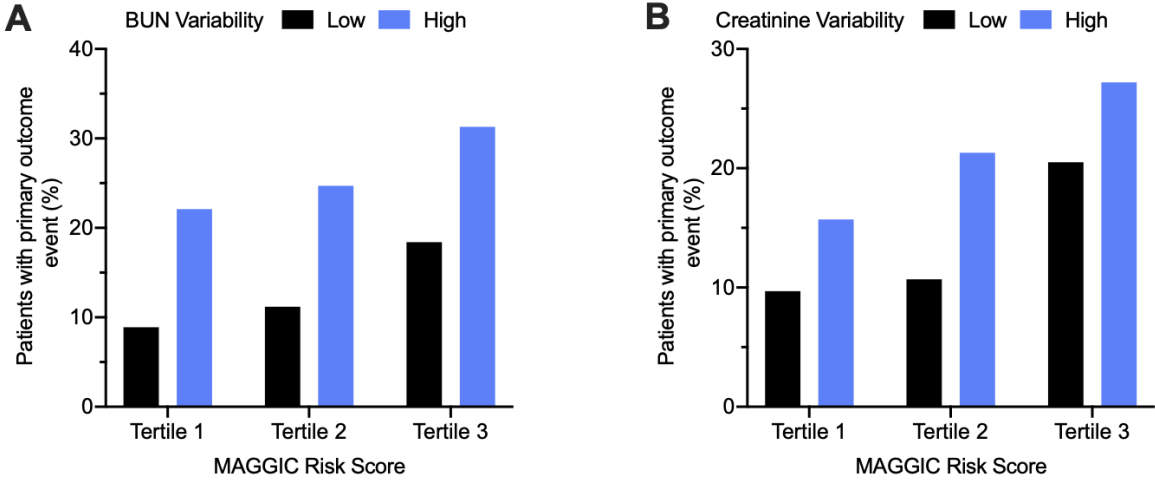

Supplement: jamacardiol-e205592-s001.pdf [file jamacardiol-e205592-s001.pdf]
